# Supplementary material for: Ultra-early response assessment in lymphoma treatment: [18F]FDG PET/MR captures changes in glucose metabolism and cell density within the first 72 hours of treatment
Source: PubMed Central journal article supplement (PMC5915494; doi:10.1007/s00259-018-3937-z), 2018-02-26

## ONLINE RESOURCE 2

Manuscript title: Ultra-early Response Assessment in Lymphoma Treatment: [18F]FDG-PET/MR Captures Changes in Glucose Metabolism and Cell Density Within the First 72 Hours of Treatment

Journal: European Journal of Nuclear Medicine and Molecular Imaging

Authors: Marius E. Mayerhoefer, Markus Raderer, Ulrich Jaeger, Philipp Staber, Barbara Kieseewetter, Daniela Senn, Ferdia A. Gallagher, Kevin Brindle, Edit Porpaczy, Michael Weber, Dominik Berzaczy, Ingrid Simonitsch-Klupp, Christian Sillaber, Cathrin Skrabs, and Alexander Haug

Correspondence:

Marius E. Mayerhoefer, MD , PhD

Department of Biomedical Imaging and Image-guided Therapy

Medical University of Vienna, Austria

Währinger Gürtel 18-20, 1090 Vienna, Austria

Tel.: +43 1 40400 48180; Fax: +43 1 40400 48980

Email: [marius.mayerhoefer@meduniwien.ac.at](mailto:marius.mayerhoefer@meduniwien.ac.at)

**Online Resource 2.** Line graphs depicting the patient-based rates of change of standardized [18F]FDG uptake values (SUVmean) and apparent diffusion coefficients (ADCmean) in the two DLBCL groups between the three time points, individually for each patient and treatment regimen (R-CHOP or DA-EPOCH-R). There is a trend for a stronger effect of R-CHOP within the first 48-72 hours, compared to DA-EPOCH-R, even though both treatment groups show major interindividual differences in terms of response.

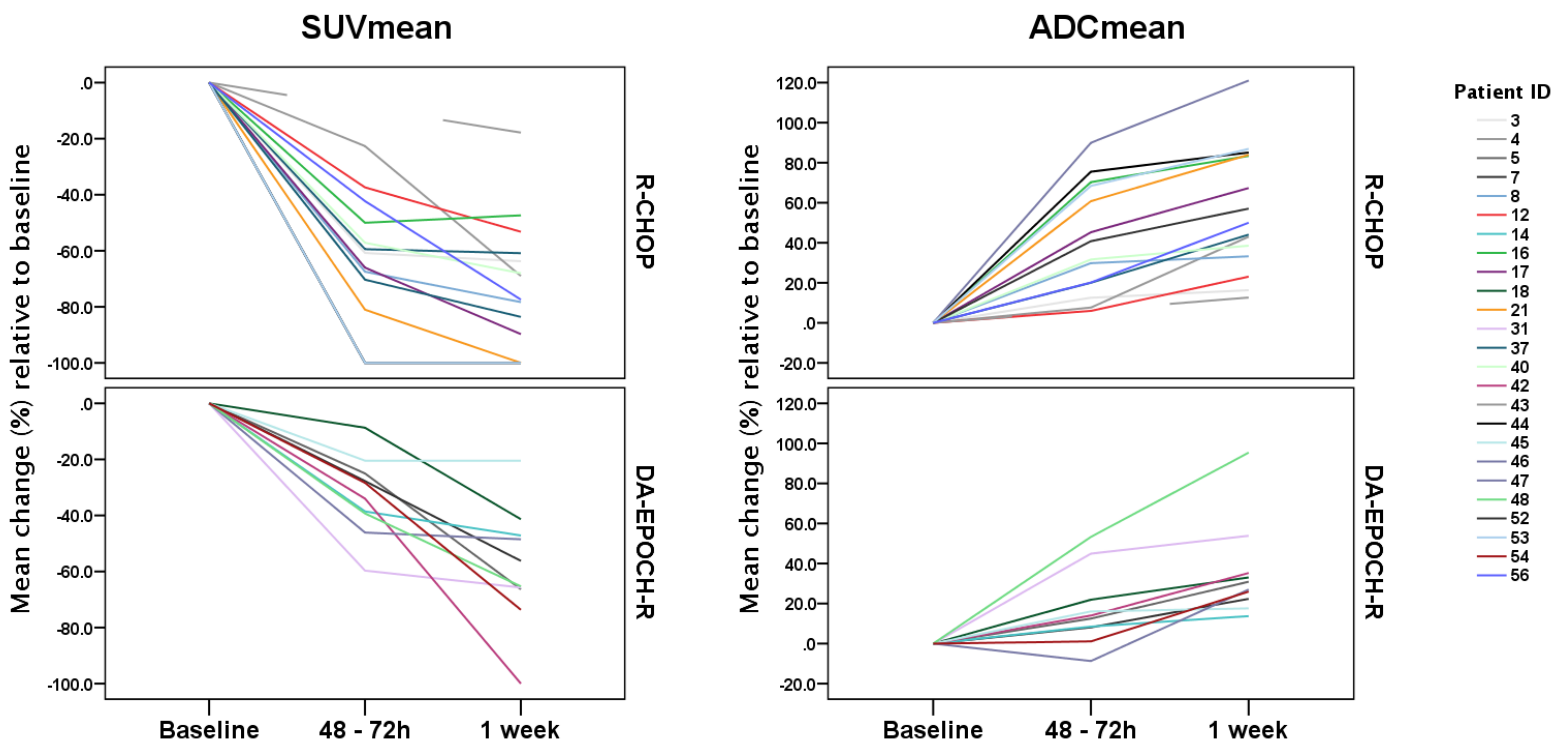

Supplement: 259_2018_3937_MOESM2_ESM.pdf [file 259_2018_3937_MOESM2_ESM.pdf]
